# Supplementary material for: Explicación de un soneto de Quevedo para alumnos de Bachillerato
Source: MDPI journal article supplement (doi:10.3390/v15030750), 1956-01-01
Supplement: s1 [file s1]

**Supplementary Table S1. RT-PCR Primers used to screen the prevalence of viruses in our study**

| <b>Virus name</b>     | <b>Primer name</b> | <b>Sequence (5'→3')</b> | <b>Length</b> | <b>Product length</b> |
|-----------------------|--------------------|-------------------------|---------------|-----------------------|
| AtBastV/GCCDC11/2022  | AT-bas-F           | TCCCGCAGAACAGTGACCATT   | 22            | 368                   |
|                       | AT-bas-R           | GCCATAACGTGCCTCATACCG   | 21            |                       |
| AtPhenV1/GCCDC12/2022 | AT-PHV1-F          | CTACTTCCTGTGAGTCTTCCCTA | 24            | 321                   |
|                       | AT-PHV1-R          | TTTGCAGTTCTTTCCGTTCC    | 20            |                       |
| AtPhenV2/GCCDC13/2022 | AT-PHV2-F          | TGGGTACTTAAAGGATAAGAACG | 24            | 180                   |
|                       | AT-PHV2-R          | ACTTGGTCAGGGAGGGAGAA    | 20            |                       |

**Supplementary Table 2. Conserved domains identified in the ORF1 and ORF2 of AtBastV**

| <b>ORF</b> | <b>Identified domain</b> | <b>Description</b>                  | <b>Start (aa)</b> | <b>End (aa)</b> |
|------------|--------------------------|-------------------------------------|-------------------|-----------------|
| ORF1       | Vmethyltransf            | Viral methyltransferase             | 39                | 345             |
| ORF1       | Viral_helicase1          | Viral (Superfamily 1) RNA helicase  | 668               | 892             |
| ORF1       | RdRP_2                   | RNA dependent RNA polymerase        | 1049              | 1351            |
| ORF2       | Astro_capsid_N           | Astrovirus capsid protein precursor | 89                | 449             |

**Supplementary Table 3. Pairwise amino acid identities corresponding to ORF1 for BastVs**

|           |                                                   | AtBastV | YP_009553650<br>.1 | AVM87270.1 | AVM87261.1 | AVM87559.1 | YP_00933316<br>7.1 | YP_009408589<br>.1 | APQ43027.1 | YP_0093333<br>13.1 | AMD8159<br>9.1 | YP_00942219<br>6.1 |
|-----------|---------------------------------------------------|---------|--------------------|------------|------------|------------|--------------------|--------------------|------------|--------------------|----------------|--------------------|
| Amphibian | AtBastV/GCCDC11/2022                              |         | 34.3               | 28.5       | 31.2       | 29.7       | 31.5               | 30.7               | 30.8       | 31.3               | 25.2           | 24.6               |
|           | YP_009553650.1 Rana<br>hepevirus                  |         |                    | 26.0       | 29.0       | 28.1       | 29.8               | 30.1               | 27.9       | 27.6               | 22.9           | 23.2               |
|           | AVM87270.1 Guangdong<br>fish caecilians hepevirus |         |                    |            | 36.2       | 38.4       | 38.8               | 40.1               | 38.7       | 38.8               | 26.0           | 25.0               |
| Fish      | AVM87261.1 Dongbei<br>arctic lamprey hepevirus    |         |                    |            |            | 40.6       | 34.5               | 35.1               | 34.5       | 34.7               | 25.3           | 25.2               |
|           | AVM87559.1 Nanhai ghost<br>shark hepevirus        |         |                    |            |            |            | 36.0               | 36.5               | 37.6       | 38.0               | 25.5           | 25.5               |
| Porcine   | YP_009333167.1<br>VietNam/Porcine/17489_85        |         |                    |            |            |            |                    | 45.1               | 42.1       | 42.7               | 24.1           | 23.6               |
| Bat       | YP_009408589.1<br>VietNam/Bat/16715_78            |         |                    |            |            |            |                    |                    | 49.2       | 50.0               | 25.9           | 25.3               |
| Rat       | APQ43027.1<br>VietNam/Rat/14294_55                |         |                    |            |            |            |                    |                    |            | 94.6               | 24.4           | 24.3               |
|           | YP_009333313.1<br>VietNam/Rat/16715_10            |         |                    |            |            |            |                    |                    |            |                    | 25.1           | 25.3               |
| Human     | AMD81599.1 Bastrovirus 1                          |         |                    |            |            |            |                    |                    |            |                    |                | 83.7               |
|           | YP_009422196.1<br>Bastrovirus 7                   |         |                    |            |            |            |                    |                    |            |                    |                |                    |

**Supplementary Table 4. Pairwise amino acid identities corresponding to ORF2 for BastVs**

|           |                                                | AtBastV | YP_00955365<br>1.1 | AVM87270.1 | YP_00933316<br>8.1 | YP_00940859<br>0.1 | APQ43028.1 | YP_00933331<br>4.1 | AMD81600.1 | YP_00942219<br>7.1 |
|-----------|------------------------------------------------|---------|--------------------|------------|--------------------|--------------------|------------|--------------------|------------|--------------------|
| Amphibian | AtBastV/GCCDC11/2023                           |         | 12.6               | 28.1       | 15.6               | 17.8               | 19.2       | 19.2               | 19.5       | 20.1               |
|           | YP_009553651.1 Rana hepevirus                  |         |                    | 13.5       | 10.3               | 14.2               | 13.2       | 13.4               | 9.6        | 10.8               |
|           | AVM87270.1 Guangdong fish caecilians hepevirus |         |                    |            | 15.8               | 18.5               | 15.8       | 15.6               | 19.3       | 19.5               |
| Porcine   | YP_009333168.1 VietNam/Porcine/17489_85        |         |                    |            |                    | 28.5               | 26.6       | 26.4               | 15.5       | 14.8               |
| Bat       | YP_009408590.1 VietNam/Bat/16715_78            |         |                    |            |                    |                    | 35.5       | 35.5               | 18.2       | 17.8               |
| Rat       | APQ43028.1 VietNam/Rat/14294_55                |         |                    |            |                    |                    |            | 93.0               | 19.4       | 18.3               |
|           | YP_009333314.1 VietNam/Rat/16715_10            |         |                    |            |                    |                    |            |                    | 19.8       | 18.8               |
| Human     | AMD81600.1 Bastrovirus 1                       |         |                    |            |                    |                    |            |                    |            | 76.2               |
|           | YP_009422197.1 Bastrovirus 7                   |         |                    |            |                    |                    |            |                    |            |                    |
